# Supplementary material
Source: PubMed Central journal article supplement (PMC4123657)
Supplement: NIHMS608809-supplement-1.pdf [file NIHMS608809-supplement-1.pdf]

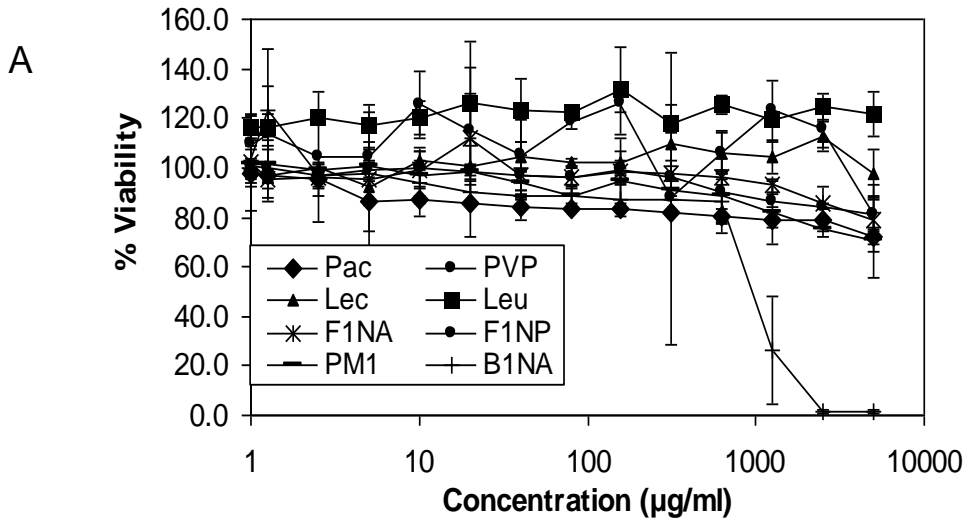

Pac: Pure paclitaxel powder      Lec: Lecithin powder  
 Leu: Leucine powder              PVP: PVP K90 powder  
 PM: Physical mixture of F1 components  
 (0.1: 0.02: 0.01: 0.1; Pac: Lec: PVP K90: Leu)  
 B1NA: F1 Blank nanoparticle agglomerates    F1NP: F1 nanoparticles  
 F1NA: F1 nanoparticle agglomerates

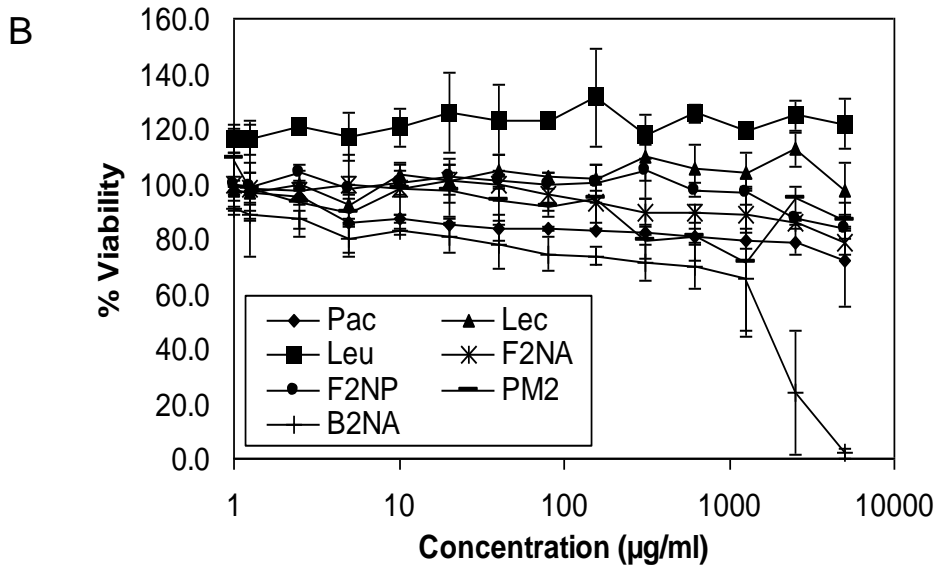

Pac: Pure paclitaxel powder    Lec: Lecithin powder    Leu: Leucine powder  
 PM: Physical mixture of F2 components (0.1: 0.02: 0.1; Pac: Lec: Leu)  
 B2NA: F2 Blank nanoparticle agglomerates    F2NP: F2 nanoparticles  
 F2NA: F1 nanoparticle agglomerates

Supplementary Figure 1. Viability of A549 cells in the presence of formulation components A) F1 and B) F2 paclitaxel nanoparticle agglomerates as determined by an MTS assay.
